# Supplementary material
Source: PubMed Central journal article supplement (PMC2804746)
Supplement: NIHMS86265-supplement-1_si_001.pdf [file NIHMS86265-supplement-1_si_001.pdf]

SUPPORTING INFORMATION

**Thioredoxin reductase from *Thermoplasma acidophilum*: a new twist on redox regulation**

*Hector H. Hernandez, Orlando A. Jaquez, Michael J. Hamill, Sean J. Elliott, and Catherine L. Drennan*

**Figure S1.** Alignment of selected TrxR sequences from PSI-BLAST (1). Sequences were aligned using the program ClustalW (2) and the output was rendered using the web interface ESPrnt 2.2 (3). Sequences are *E. coli* (gi:16128855), *V. parahaemolyticus* (gi:28898025), *V. cholerae* 0395 (gi:147674572), *S. boydii* BS512 (gi:82543374), *S. enterica* subsp. *enterica* serovar *Typhi* str. CT18 (gi:62179482), *Y. pestis* CO92 (gi:16121654), and *S. pneumoniae* R6 (gi:15903355). White letters in red blocks are strictly conserved residues. Red letters in black boxes are more than 50% conserved residues.

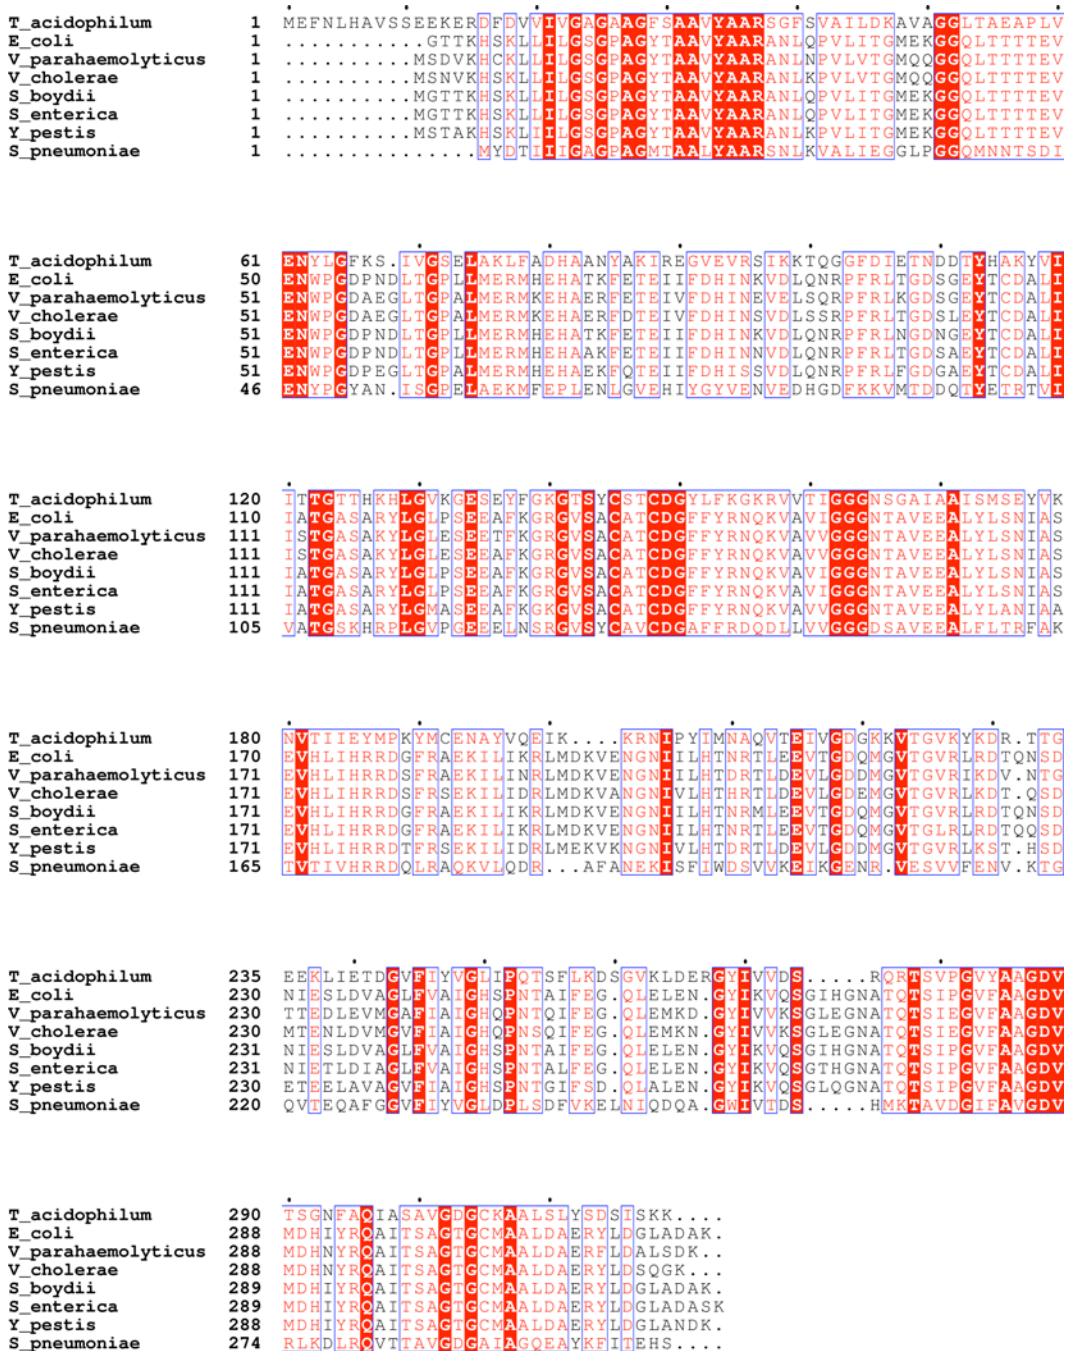

**Figure S2.** Alignment of selected Trx sequences from PSI-Blast (1). Sequences were aligned using the program ClustalW (2) and the output was rendered using the web interface ESPript 2.2 (3). Sequences are *E. coli* (gi:67005950), *V. parahaemolyticus* (gi:28899775), *V. cholerae* 0395 (gi:147675356), *S. boydii* BS512 (gi:82546135), *S. enterica* subsp. *enterica* serovar *Typhi* str. CT18 (gi:62182391), *Y. pestis* CO92 (gi:16124003), *S. pneumoniae* R6 (gi:15903644). White letters in red blocks are strictly conserved residues. Red letters in black boxes are more than 50% conserved residues.

```

T_acidophilum      1  .....MKNYMGCVKRDITFNDFNRLIDEKKSFIIEIWAIDW
E_coli              1  .....MSDKIIHLTDDSF..TDVLKADGAILVDFWAEW
V_parahaemolyticus 1  .....MSDKILQLTDGFE..NDVINAGPVLVDFWAEW
V_cholerae         1  .....MSDKILQLTDGFE..NDVIKAGPVLVDFWAEW
S_boydii           1  MLHQQR.....NQHARLIPVELYMSDKIIHLTDDSF..TDVLKADGAILVDFWAEW
S_enterica         1  MLAKLTSAPRWMLHQHARLIPVELYMSDKIIHLTDDSF..TDVLKADGAILVDFWAEW
Y_pestis           1  .....MSDKIIHLSDSF..TDVLKASGLVLVDFWAEW
S_pneumoniae      1  .....MAK...AIDATEFE..QETK..DGLVLVDFWAEW

```

```

T_acidophilum      35  CHPCCKIAPNLEEAQKLL..NACYFYKINIDENPETVDTLNVNSIPRIIMFVVGQRQAEI
E_coli              33  CGPCCKMIAPNLEDEIADEY.QGKLTVAKLNIDQNPGTAPKYGIRGIPLLLLFKNGEVAATK
V_parahaemolyticus 33  CGPCCKMIAPNLEDEIAEY.EGKLTIGKLNIDHNAGTTPKFGIRGIPLLLLFKDGNVAATK
V_cholerae         33  CGPCCKMIAPNLEDEVADEY.AGKLTIGKLNIDHNAGTTPKFGIRGIPLLLLFKDGSVVATK
S_boydii           51  CGPCCKMIAPNLEDEIADEY.QGKLTVAKLNIDQNPGTAPKYGIRGIPLLLLFKNGEVAATK
S_enterica         59  CGPCCKMIAPNLEDEIADEY.QGKLTVAKLNIDQNPGTAPKYGIRGIPLLLLFKNGEVAATK
Y_pestis           33  CGPCCKMIAPNLEDEIAEY.EGRLLTIAKLNIDDNQGTAPKYGIRGIPLLLLFRDGEVVATK
S_pneumoniae      28  CGPCRMQGPNLDKLSSEELSEDLVLLVVKMDVDENPNTARAFGIMSIPLLLLFKKDQVVKQV

```

```

T_acidophilum      93  KGFQRLQSIIDQISKIPCDSDV
E_coli              92  VGALSKGQLKEFLDANLA...
V_parahaemolyticus 92  VGALSKTQLKEFLDANL...
V_cholerae         92  VGALSKTQLKEFLDANL...
S_boydii           110 VGALSKGQLKEFLDANLA...
S_enterica         118 VGALSKGQLKEFLDANLA...
Y_pestis           92  VGALSKGQLKAFDANL...
S_pneumoniae      88  AGVHTVEQTKAII.AELIS...

```

**Figure S3.** DNA and corresponding amino acid sequence of ORF Ta0984 from *T. acidophilum* encoding for a putative TrxR. DNA sequence was confirmed by the MIT Biopolymers Laboratory.

```

atggaatttaacctgcatgcagtatcatcagaggaaaaagaaagagatTTTgatgTTgtc 60
M E F N L H A V S S E E K E R D F D V V
atcgtcggcgccggTgctgcccggTTTTcagcggcagTctatgctgcaaggTcaggattc 120
I V G A G A A G F S A A V Y A A R S G F
agcgttgcaattctcgacaaggccgtagctggaggccttactgcagaggcaccactggta 180
S V A I L D K A V A G G L T A E A P L V
gagaattatctTggTTTcaagagcattgtcggatcagagctTgcgaaactTTTTcgccgac 240
E N Y L G F K S I V G S E L A K L F A D
catgcagcgaactatgccaaagataagggagggcgtagaggtaagatccataaagaaaacg 300
H A A N Y A K I R E G V E V R S I K K T
caaggcggctTTgacattgagacaaatgacgatacgtaccatgccaaatatgtgataata 360
Q G G F D I E T N D D T Y H A K Y V I I
acgactggaacaacgcataagcatttaggtgtcaaaggcgaatccgaatactTTgggaag 420
T T G T T H K H L G V K G E S E Y F G K
ggTacctcttactgctctacctgcgatggatacctcttcaagggaaaacgtgtggTcacg 480
G T S Y C S T C D G Y L F K G K R V V T
ataggtggcggaaactcaggggccatagctgccatatcaatgagtgaatacgtcaaaaac 540
I G G G N S G A I A A I S M S E Y V K N
gtcaccataattgaatacatgcctaagtacatgtgCGaaaacgcctacgtacaggagatc 600
V T I I E Y M P K Y M C E N A Y V Q E I
aagaaaagaaacataccctacataatgaacgctcaggtaaccgagatcgtTggggatgga 660
K K R N I P Y I M N A Q V T E I V G D G
aagaaggtcaccggagTtaaatacaaaagacaggacaacgggtgaagaaaaactcatagaa 720
K K V T G V K Y K D R T T G E E K L I E
actgacggcgtcttcatatacgtcggcctcataccgcagacttcatttctcaaggatagt 780
T D G V F I Y V G L I P Q T S F L K D S
ggcgtaaaactggatgagagagggTacatagTggTgattcaaggcagagaactagcgtt 840
G V K L D E R G Y I V V D S R Q R T S V
ccaggggtatatgcagcaggagacgttacatccggcaactTcgcacagattgcctctgcc 900
P G V Y A A G D V T S G N F A Q I A S A
gtTggagatggctgcaaggcagcgtTTTcctTgtattctgattctatatccaaaaaa 957
V G D G C K A A L S L Y S D S I S K K

```

**Figure S4.** DNA and corresponding amino acid sequence of ORF Ta0866 from *T. acidophilum* encoding for a putative Trx. DNA sequence was confirmed by the MIT Biopolymers Laboratory.

```
atgaagaattatatgggctgCGTTAAAGATATAACATTCAATGATTTCAATCGTCTCATA 60
M K N Y M G C V K D I T F N D F N R L I
gatgagaaaaaaagcttcataattgagttatgggctgattggtgccatccctgcaagatc 120
D E K K S F I I E L W A D W C H P C K I
atggcgccatacctggaggaggcgtgtcagaagttgaacgcctgctacttttacaagata 180
M A P Y L E E A C Q K L N A C Y F Y K I
aatatcgatgagaatcctgagatcgttgacacgcttaatgtgaacagcataccaaggata 240
N I D E N P E I V D T L N V N S I P R I
ataatgtttgttgaaggccagcgccaggccgagcttaagggatttcagaagcttcaatca 300
I M F V E G Q R Q A E L K G F Q K L Q S
attattgaccagatttcaaaaattccctgCGATTCCGTC 339
I I D Q I S K I P C D S V
```

**Figure S5.** SDS-PAGE [4-20% (w/v)] gel of the isolated **(A)** *taTrxR* and **(B)** *taTrx* from the overexpression *E. coli* Rosetta™ (DE3) pLysS strain.

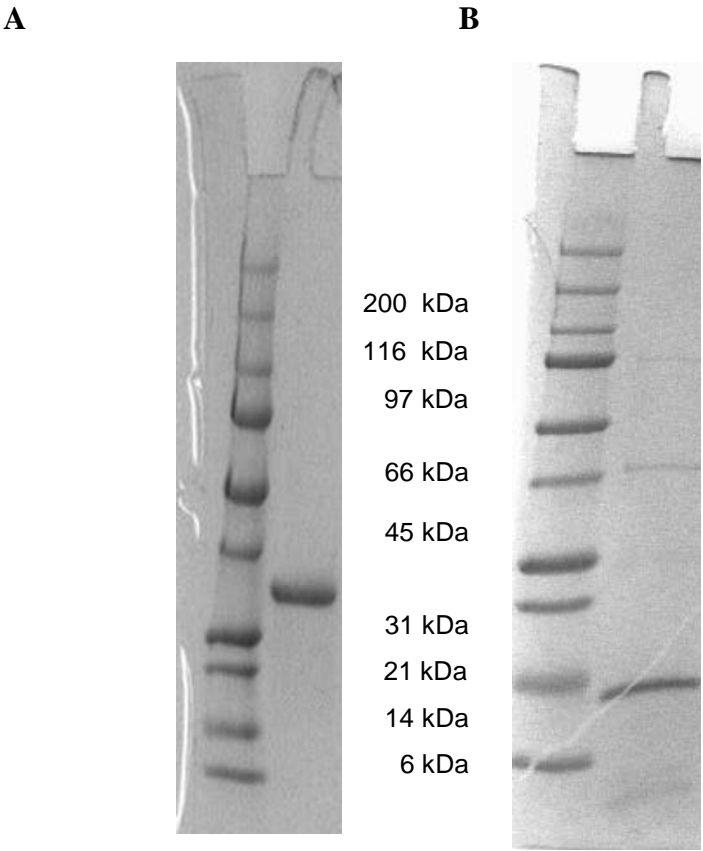

**Figure S6.** Spectral recordings of temperature dependent degradation of NADPH and NADH measured at 340 nm. **(A)** NADPH at 20° C (solid line), NADPH at 80° C (dashed line), and heat treated NADPH cooled down to 20° C (dotted line). **(B)** Spectra of temperature dependent degradation of NADH. NADH at 20° C (solid line), NADH at 80° C (dashed line), and heat treated NADH cooled down to 20° C (dotted line). **(C)** Time dependent degradation of NADPH at 20° C (square), 60° C (circle), and 80° C (triangle). **(D)** Time dependent degradation of NADH at 20° C (square), 60° C (circle), and 80° C (triangle).

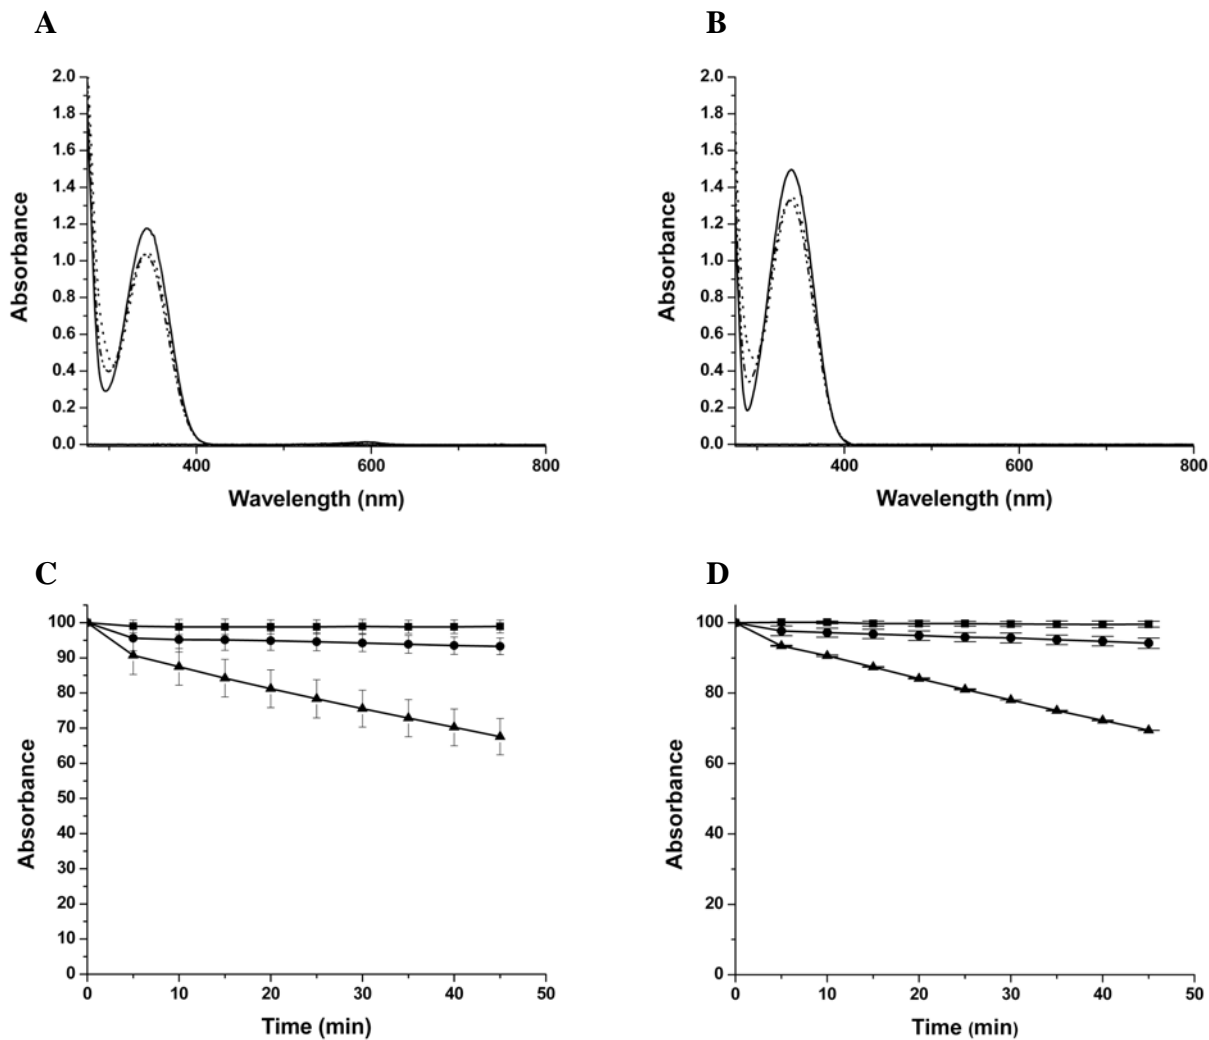

**Figure S7.** Reduction of insulin catalyzed by *ta*Trx. The DTT dependent reduction of bovine insulin was carried out as described in Methods. The increase in turbidity at 650 nm is plotted against the reaction time. Solid line is 70  $\mu$ M *ta*Trx, dashed line is 66  $\mu$ M *ta*Trx, and dotted line is 43  $\mu$ M *ta*Trx.

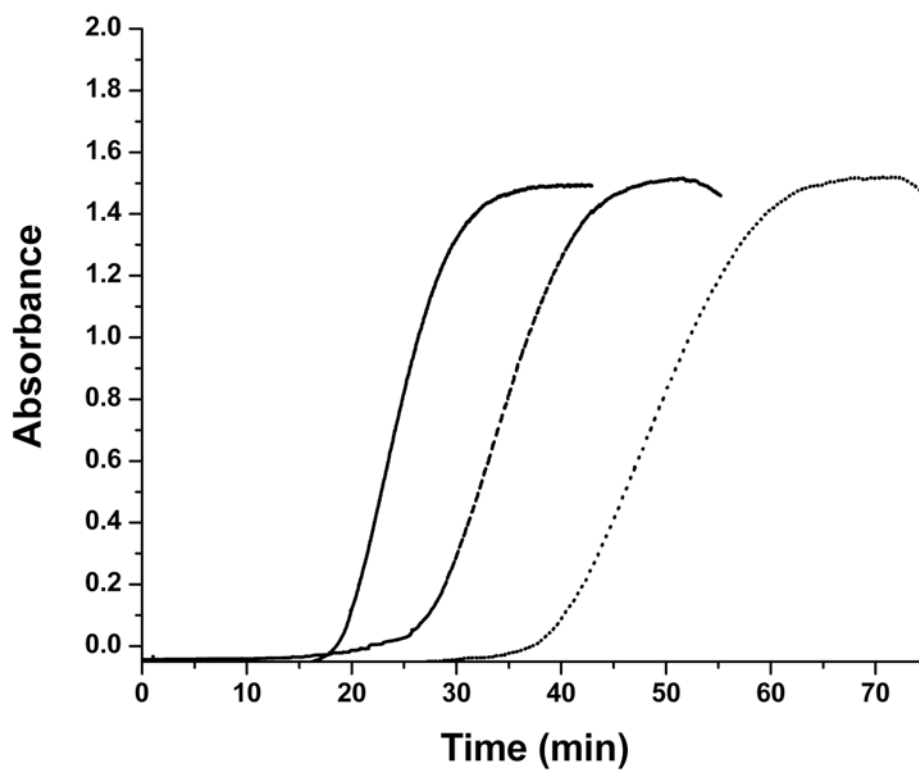



**Figure S8.** Trx activity in thioredoxin system using *ta*Trx and *ec*TrxR. The assays were performed using 3.8  $\mu$ M *ec*TrxR and varying concentrations of *ta*Trx. Assays were performed as described in Methods.

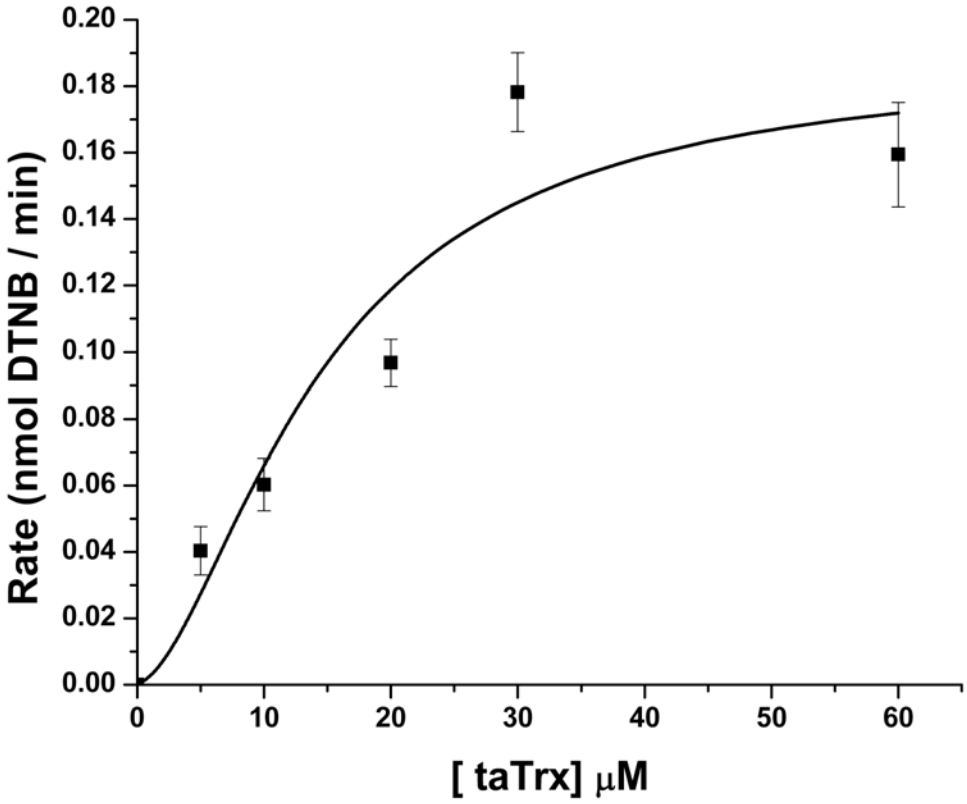

**Figure S9.** View of the FAD binding pocket of *ta*TrxR. The FAD molecule is shown in composite omit map density contoured at 1  $\sigma$ . FAD atoms are colored in CPK format (C in light grey, N in blue, O in red, P in orange).

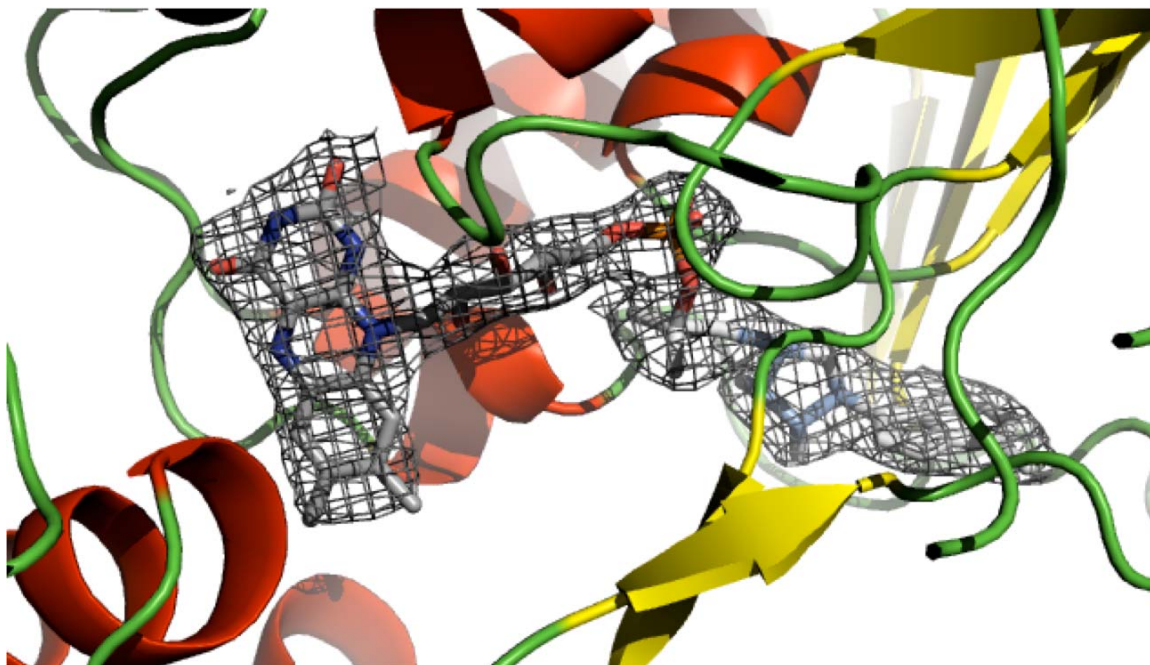

**Figure S10.** Schematic drawing of the FAD molecule in *ta*TrxR. Polar atoms of residues of molecule A that are within 4 Å of atoms of FAD are listed. Distances are in Å.

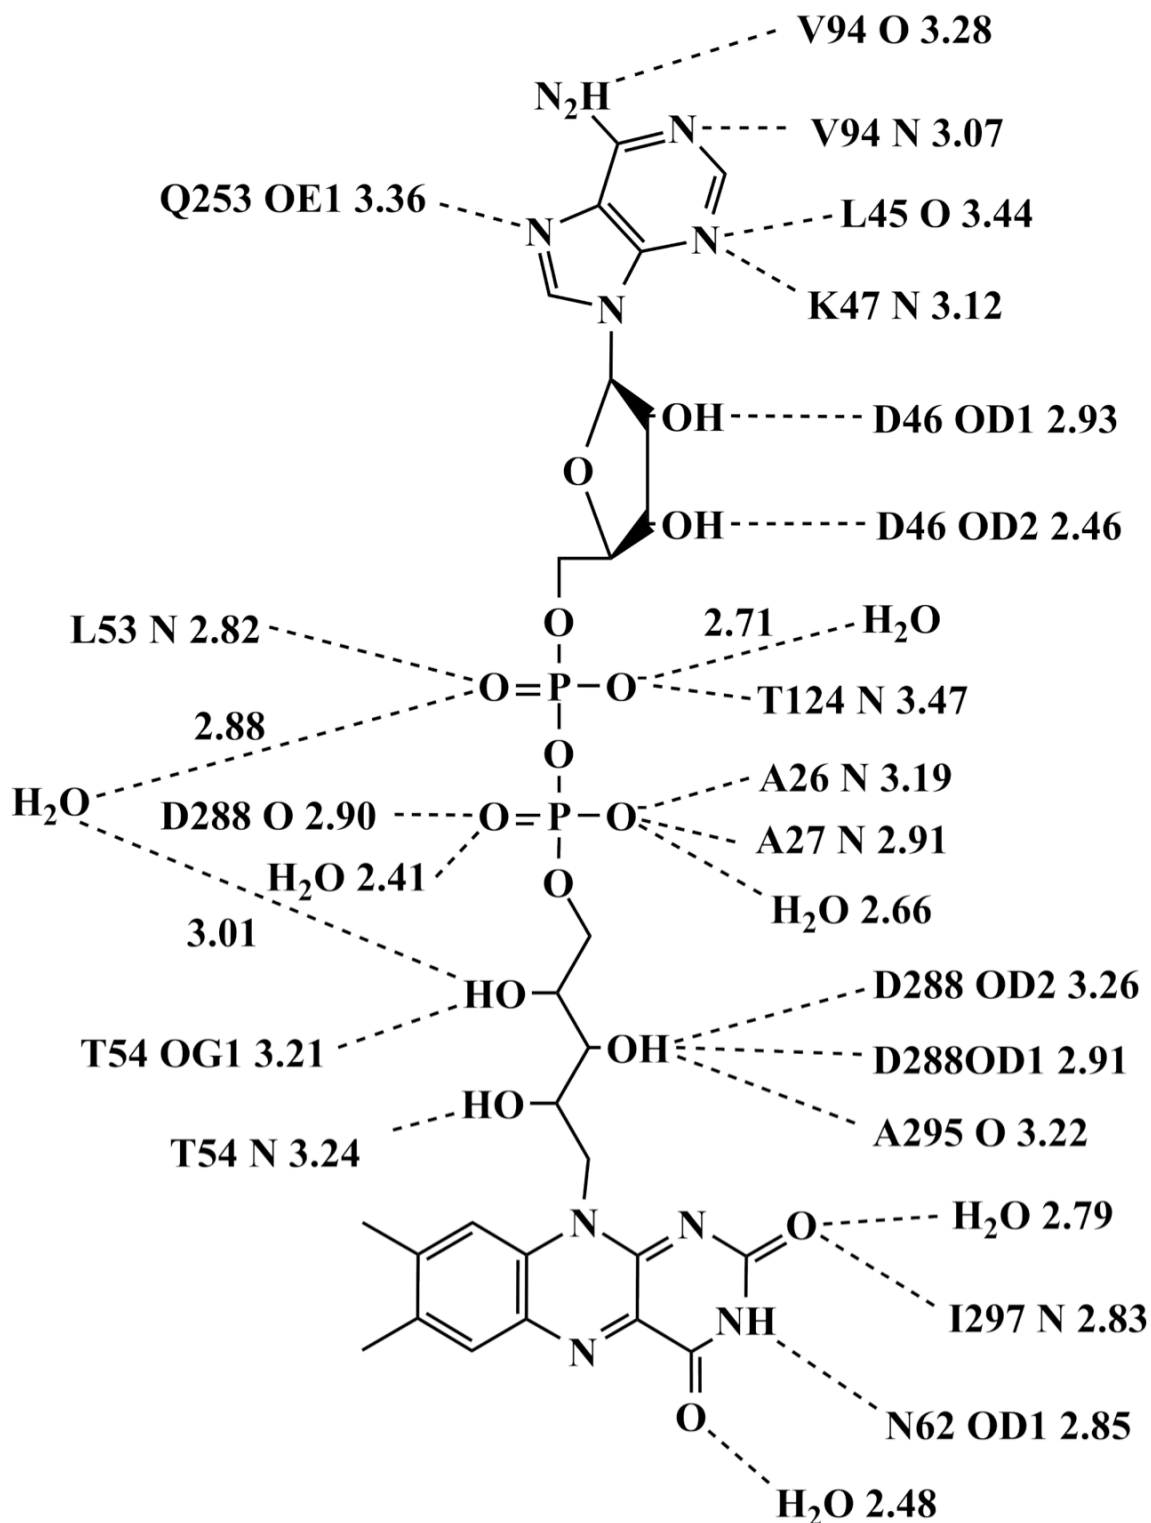

**Figure S11.** Space filling surface model of (A) *ec*TrxR and (B) *ta*TrxR NADPH binding domain. The positively charged residues are represented in blue and the negatively charged residues are represented in red. Neutral residues are represented as white. Surface calculations were made using the APBS module in Pymol (4).

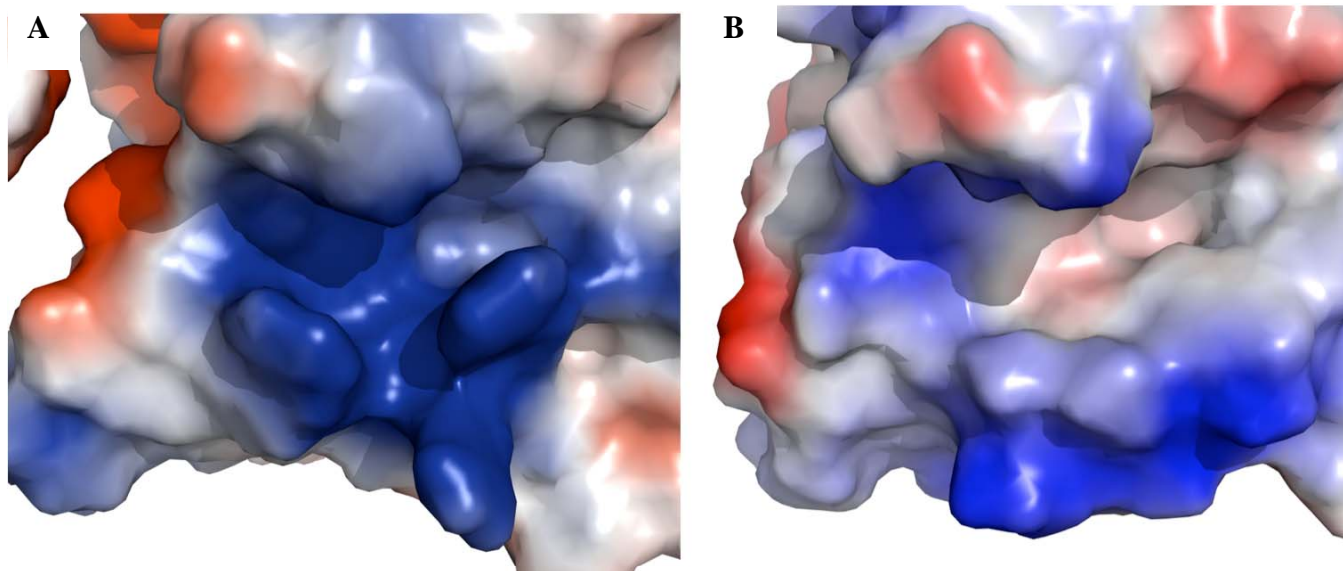

**Figure S12.** Structural superposition of TrxR NADPH binding domains. **(A)** The *ec*TrxR NADPH binding domains crystallized with NADPH analogue AADP (1TDF) is in teal and without NADPH (1TDE) is in cyan. **(B)** The *ec*TrxR (1TDF) co-crystallized with AADP, an NADPH analogue, is in teal, *A. thaliana* TrxR (1VDC) structure is in orange, *M. tuberculosis* TrxR (2A87) co-crystallized with NADP is in magenta, and *ta*TrxR is in yellow.

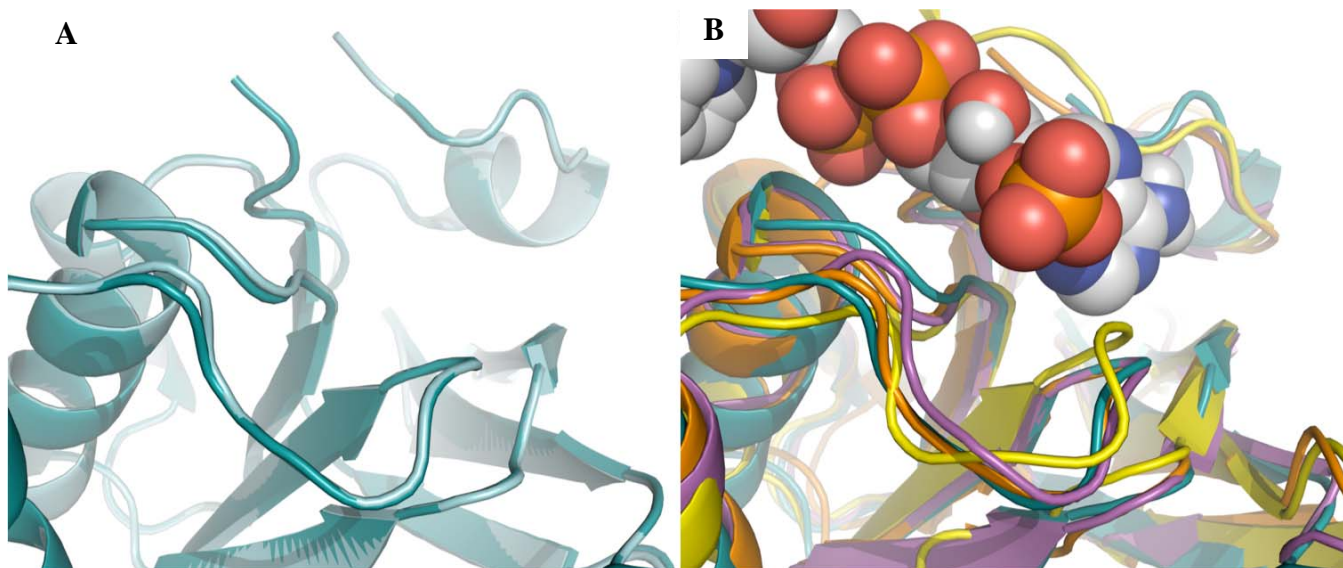

1. Lipman, D. J. (1997) Gapped BLAST and PSI-BLAST: a new generation of protein database search programs. *Nucleic Acids Res* 25, 3389-3402.
2. Thompson J.D., Higgins D.G., Gibson T.J. (1994) CLUSTAL W: improving the sensitivity of progressive multiple sequence alignment through sequence weighting, position-specific gap penalties and weight matrix choice. *Nucleic Acids Res.*22, 4673-4680.
3. Gouet, P., Courcelle, E., Stuart, D. I., Metoz, F. (1999) ESPript: analysis of multiple sequence alignments in PostScript. *Bioinformatics* 15, 305-308.
4. Baker, N. A., Sept, D., Joseph, S., Holst, M. J., McCammon, J. A. (2001) Electrostatics of nanosystems: application to microtubules and the ribosome. *Proc Natl Acad Sci U S A* 98, 10037-10041.
